# Supplementary material for: Humidity as a non-pharmaceutical intervention for influenza A
Source: PubMed Central journal article supplement (PMC6155525; doi:10.1371/journal.pone.0204337), 2018-09-25
Supplement: pone.0204337.s001.pdf [file pone.0204337.s001.pdf]

# S1 Fig. Methodology flow chart of samples

**Sample Preparation**  
(Mayo Clinic)



Wrap      Assemble

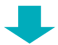

**Sample Collection**  
(Aldrich preschool)



Wrap additional classroom objects (if needed)  
Calibrate air sampler pumps  
Run 150 minutes (during class)

Morning preschool classes (students ages 3-5) in rooms



Unwrap school objects  
Collect wrapped objects



Measure air particle sizes

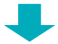

**Sample Processing**  
(Mayo Clinic)

Dust paper with fingerprinting powder  
Remove fingerprint (+) pieces  
Place paper into media

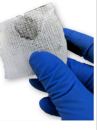

Disassemble air samplers  
Add media to tubes  
Place filter into media



Vortex, incubate & centrifuge  
Isolate viral RNA  
RT-PCR  
Identify Flu A+  
Infectivity assay (electrical impedance)
