# Supplementary material for: Humidity as a non-pharmaceutical intervention for influenza A
Source: PubMed Central journal article supplement (PMC6155525; doi:10.1371/journal.pone.0204337), 2018-09-25

S4 Fig. Floor plans of preschool classrooms including study classrooms.

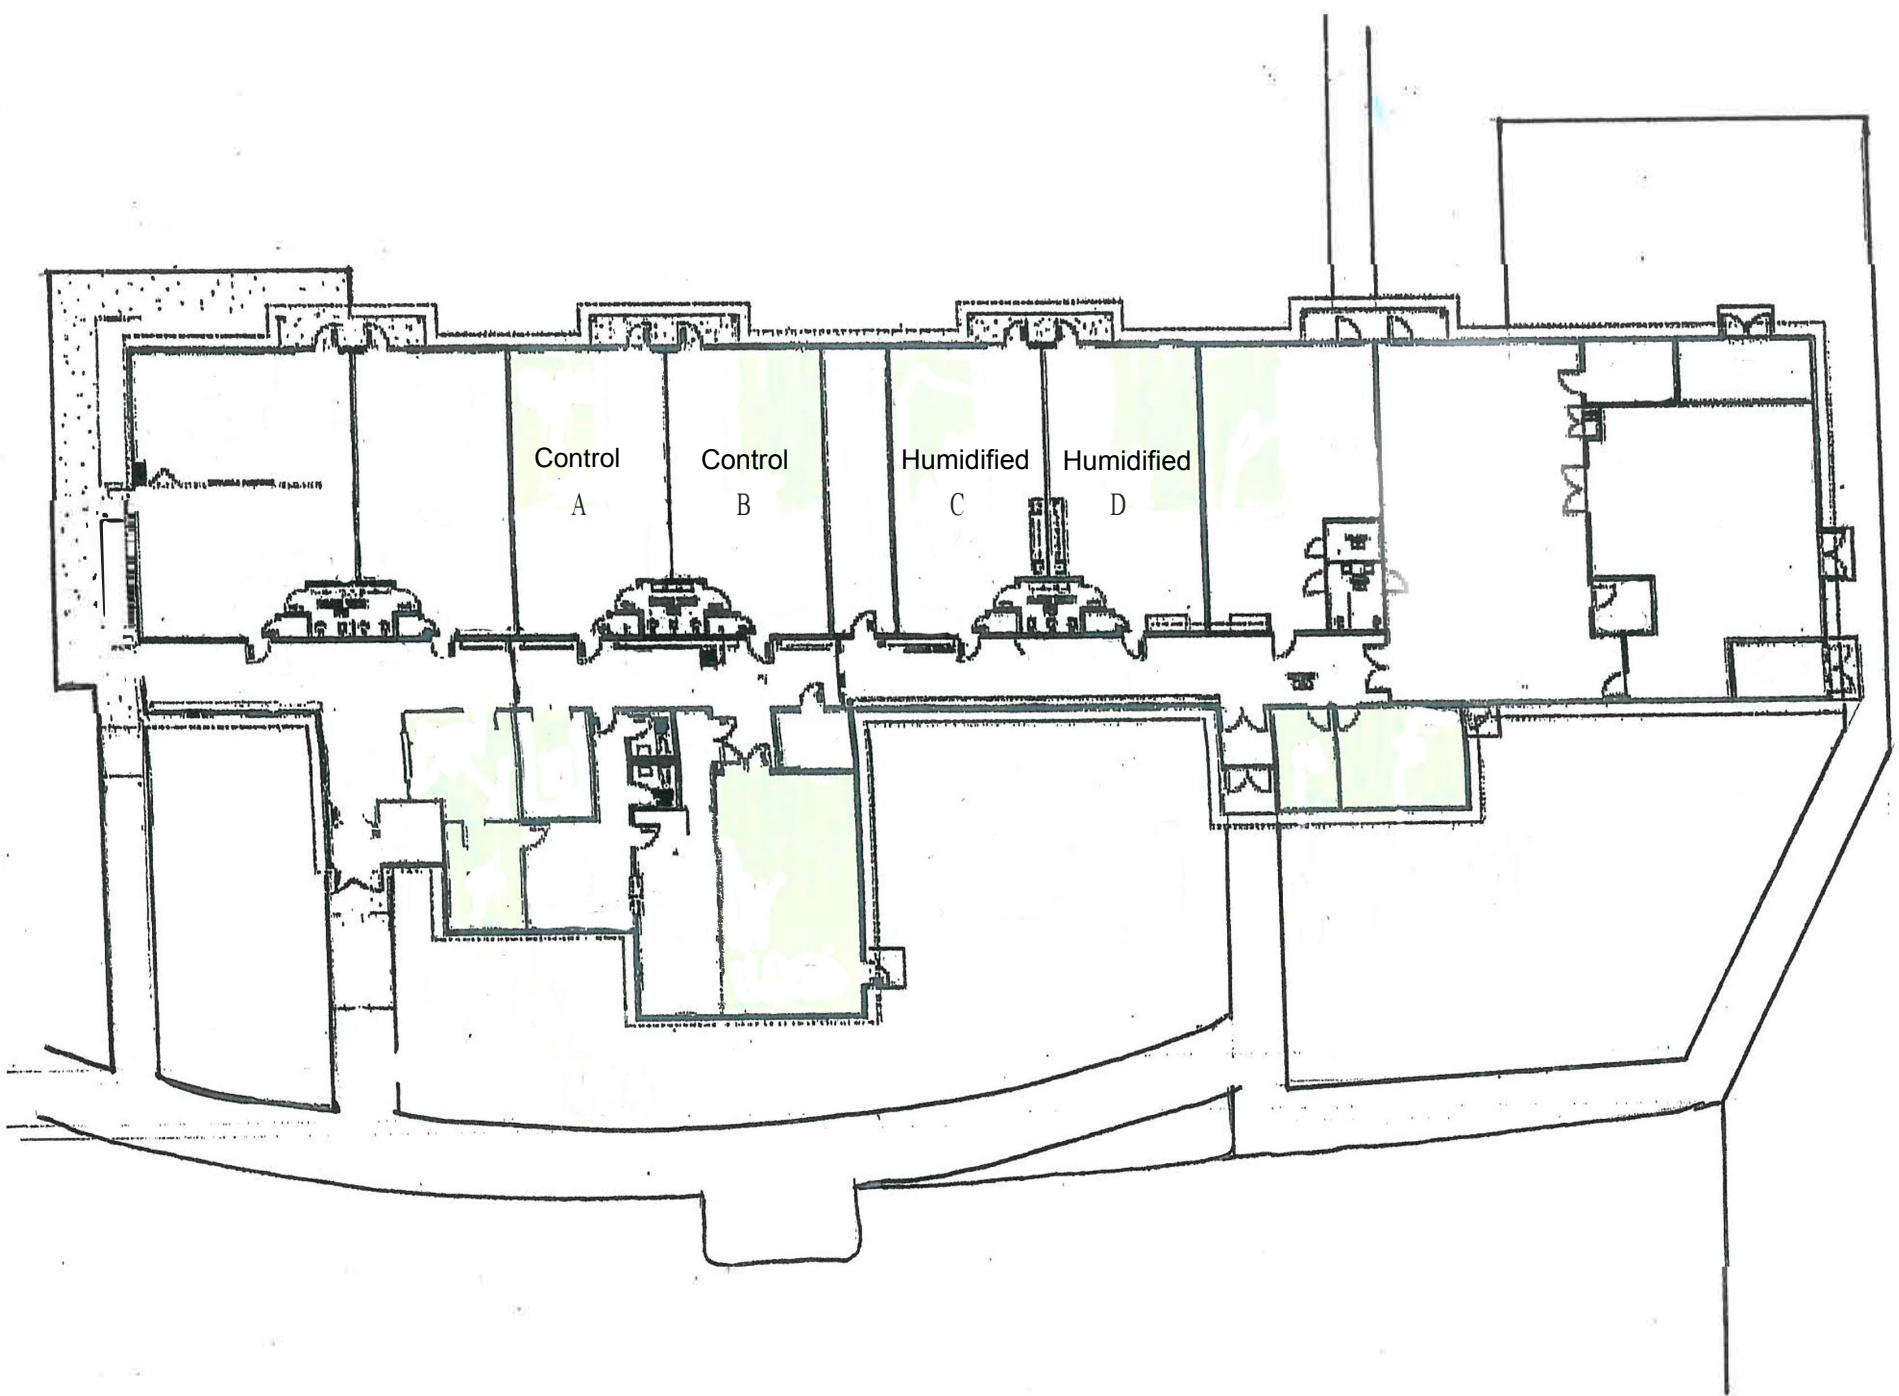

Supplement: pone.0204337.s004.pdf [file pone.0204337.s004.pdf]
