# Supplementary material for: Humidity as a non-pharmaceutical intervention for influenza A
Source: PubMed Central journal article supplement (PMC6155525; doi:10.1371/journal.pone.0204337), 2018-09-25
Supplement: pone.0204337.s008.pdf [file pone.0204337.s008.pdf]

**S2 Table. Sequences of primers used for real-time PCR.**

| Primer name   | Primer Sequence             | Product size (bp) | Annealing Temperature |
|---------------|-----------------------------|-------------------|-----------------------|
| InfA F        | TTTCACCGAGGAGGGAGCA         | 105               | 56.5°C                |
| InfA R        | CCTCCGATGAGGACCCCAA         |                   |                       |
| Influenza Bs  | GTCCATCAAGCTCCAGTTTT        | 145               |                       |
| Influenza Bas | TCTTCTTACAGCTTGCTTGC        |                   |                       |
| RSVB F        | GCATTAGCCAAAGCAGCAATAC      | 155               |                       |
| RSVB R        | CATCCATTAGACCATTTAATTGAGAGC |                   |                       |
